# Supplementary material
Source: PubMed Central journal article supplement (PMC1914130)
Supplement: plntphys_pp.107.099903_2.pdf [file plntphys_pp.107.099903_2.pdf]

**Figure S1. Vegetative phenotype of *cts* mutants: leaves.**

Values are means  $\pm$  SE for 10 plants.
